# Supplementary material
Source: MDPI journal article supplement (https://www.mdpi.com/2073-4360/7/6/1177)
Supplement: s1 [file s1]

## Supplementary Information

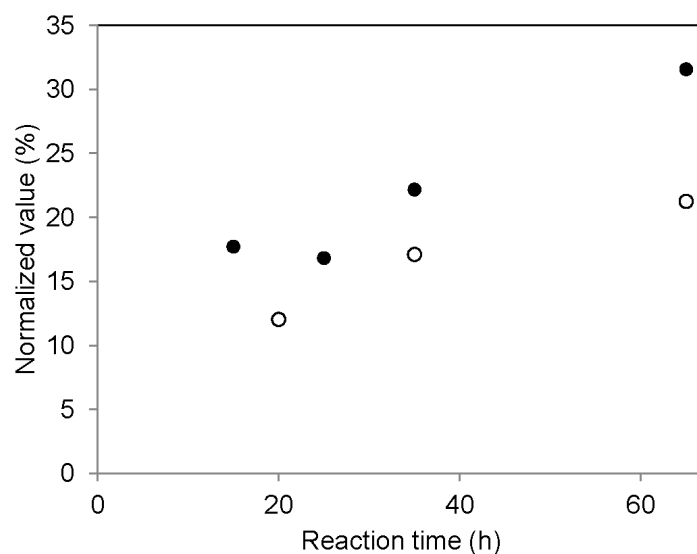

**Figure S1.** The ratio of racemization as a function of the reaction time at 150 (○) and 180 °C (●). Relative integrated intensity ratio of iii + iss/ssi to sis, isi, and iis/sii in the homonuclear decoupled  $^1\text{H}$  NMR spectra.

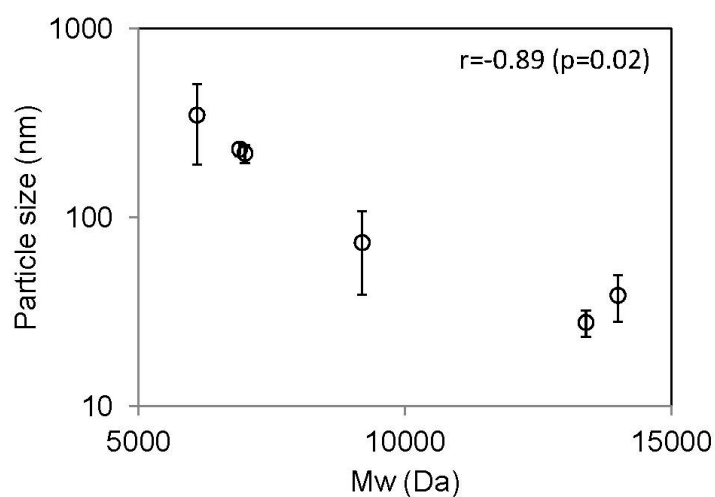

**Figure S2.** Relationship between  $M_w$  and particle size of PLA-PEG copolymers with different multiblock indexes.
